# Supplementary material for: VdPT1 Encoding a Neutral Trehalase of Verticillium dahliae Is Required for Growth and Virulence of the Pathogen
Source: MDPI journal article supplement (doi:10.3390/ijms25010294), 2023-12-25
Supplement: s1 [file s1]

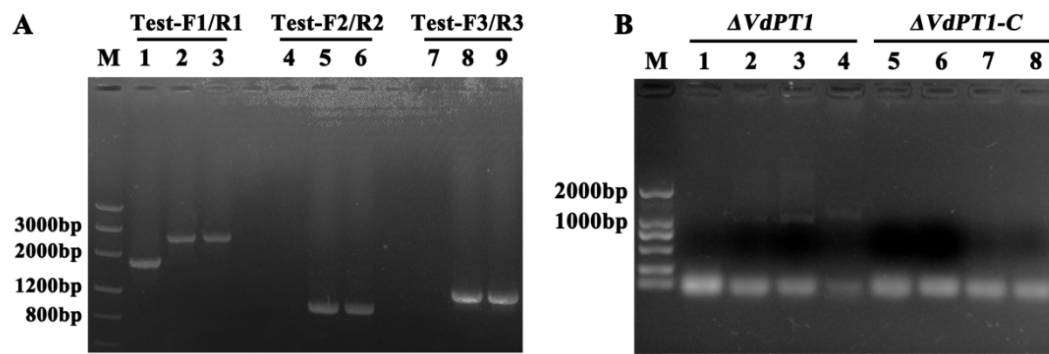

**Figure S1.** Verification of the  $\Delta VdPT1$  deletion mutants and the  $\Delta VdPT1-C$  complementary strain by PCR.

(A) Lanes 1-3 are PCR amplification results by the primer pair of Test-F1/R1 as primers; lanes 4-6 are PCR amplification result by the primer pair of Test-F2/R2; lanes 7-9 are PCR amplification results by the primer pair of Test-F3/R3. M indicates DNA marker. Lanes 2, 3, 5, 6, 8 and 9 are the PCR amplification results of  $\Delta VdPT1$ , and lanes 1, 4 and 7 are the PCR amplification results of wild-type Vd991. (B) PCR validation of the complementary strain  $\Delta VdPT1-C$ . Lanes 2-4 are PCR amplification results of  $\Delta VdPT1$ . Lanes 5-7 are PCR amplification results of the complementary mutant strain  $\Delta VdPT1-C$ . Lanes 1 and 8 are negative controls. M is a DNA ladder (DS2000).

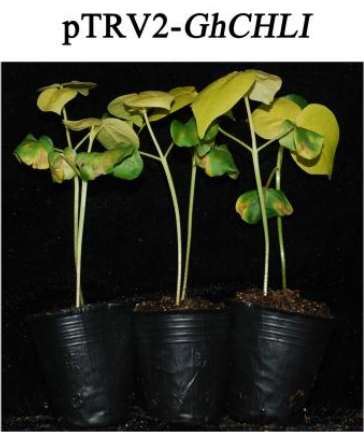

**Figure S2.** Leaf-bleaching phenotype of cotton seedlings treated with pTRV2-*GhCHLI* at 10 days after injection.

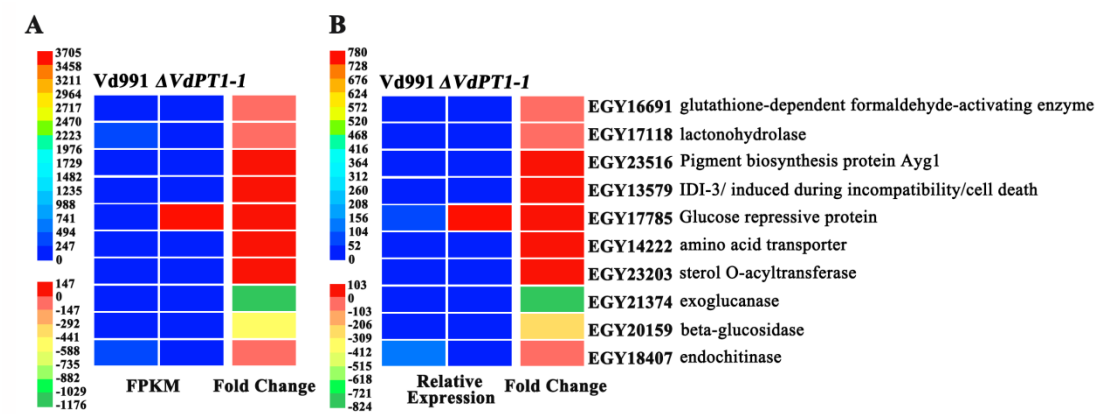

**Figure S3.** Analysis of RNA-seq data reliability.

(A) Heatmap of the expression level of 10 DEGs based on FPKM values. (B) Heatmap of the expression level of the same 10 DEGs based on qRT-PCR.

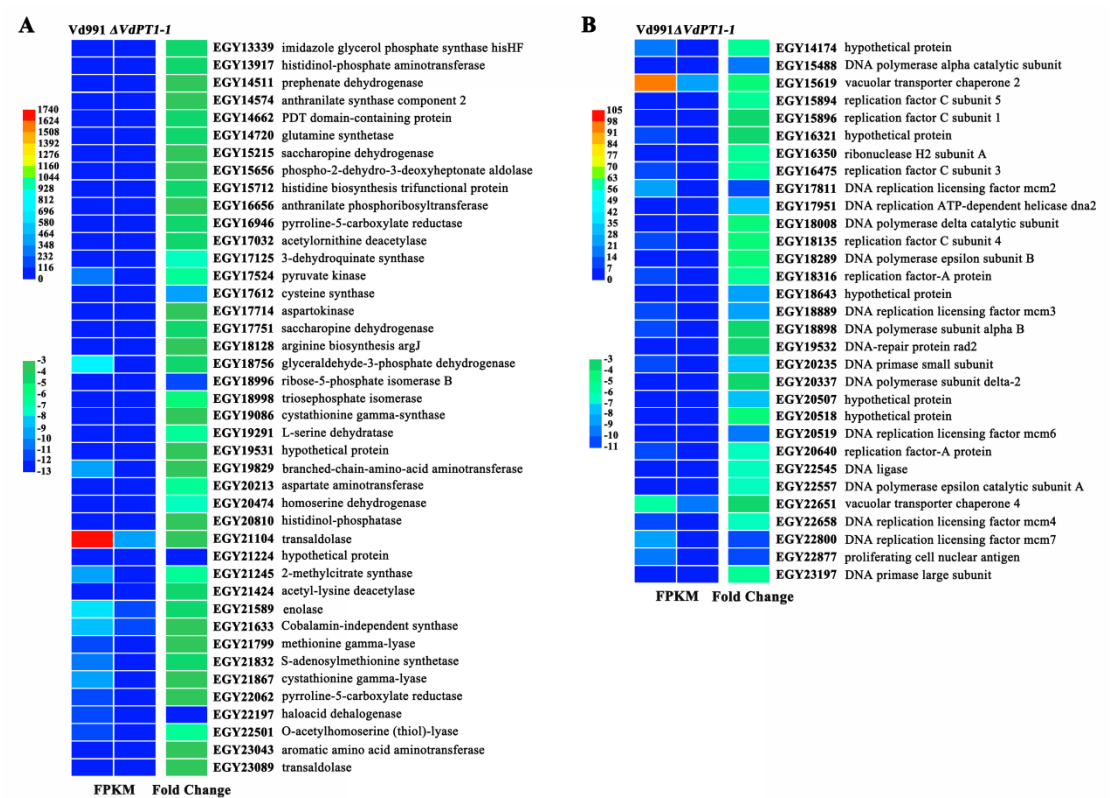

**Figure S4. Heatmap of DEGs related to DNA replication and amino acid synthesis.**  
(A) Heatmap of DEGs related to amino acid synthesis. (B) Heat map of DEGs related to DNA replication.
