# Supplementary material for: VdPT1 Encoding a Neutral Trehalase of Verticillium dahliae Is Required for Growth and Virulence of the Pathogen
Source: Int J Mol Sci. 2023 Dec 25;25(1):294. doi: 10.3390/ijms25010294 (PMC10778863; doi:10.3390/ijms25010294)
Supplement: Supplementary file 1 [file ijms-25-00294-s001.zip › Supplement Table S1.xlsx]

## Sheet: Sheet1
Table S1 Primer sequences used in this study
Primer name	Primer sequence（5′–3′）
VdPT1-OFR-F	ATGACGCTTCTTTCCAAGTCG	Gene knockout
VdPT1-OFR-R	TTAATACCCCCTCAACTTGGC
VdPT1-Flank-5F	GGTGGCGGCCGCTCTAGACTACCTACCTTGGGTACTTACCTTA
VdPT1-Flank-5R	AAAATGCTCCTTCAAGGTTGACGAGCACGATGCCCAAACT
VdPT1-Flank-3F	GGTTCGCAAAGATAATTGTCCAAGCCCAACGACGCTGTTCGCC
VdPT1-Flank-3R	GACGGTATCGATAAGCTTTTAATACCCCCTCAACTTGGCAAAC
VdPT1-HPH-F	TCGTGCTCGTCAACCTTGAAGGAGCATTTTTGGGCTTGGCTGG
VdPT1-HPH-R	GTTGGGCTTGGACAATTATCTTTGCGAACCCAGGGCTGGTG
Promotor-F	ACGGCCAGTGCCAAGCTTCTATTTTCACGTCTGCTCGAA
Promotor-R	ATTCACTAGTCAGGATCCACAATTTGCAGGTCGTTTGTA
Test-VdPT1-F1	AAGCTCATGCGACCTAGCACACGCACC
Test-VdPT1-R1	GAAGTAACCGGACAGCGTGTCATTCCA
Test-VdPT1-F2	AAGCTCATGCGACCTAGCACACGCACC
Test-VdPT1-R2	GATAAACATAACGATCTTTGTAGAAACC
Test-VdPT1-F3	CGAGGACTGCCCCGAAGTCCGGCAC
Test-VdPT1-R3	GAAGTAACCGGACAGCGTGTCATTCCA
Test-Hyg-F	AAGGTGAGTCCTCCAACCA
Test-Hyg1-R	GAAGCACGAATCCTCTTGTT
VdPT1-F	GGAATTC CTACCTCGACTCGACCTTCTG	HIGS
VdPT1-R	GGGTACC CGCACTACGGCTACCAAAC
VdPT1-qF	CTACCTCGACTCGACCTTCTG
VdPT1-qR	CGCACTACGGCTACCAAAC
Tubulin-F	TCCACCTTCGTCGGTAACTC
Tubulin-R	GCCTCCTCCTCGTACTCCTC
Ve-ITS1-F	AAAGTTTTAATGGTTCGCTAAGA
ST-VE1-R	CTTGGTCATTTAGAGGAAGTAA
UBQ7-F	GAAGGCATTCCACCTGACCAAC
UBQ7-R	CTTGACCTTCTTCTTCTTGTGCTTG
VDAG_07855-qF	GTGCTCTGTTCTCCATCGTC	RNA-seq verification
VDAG_07855-qR	TCACGTCGTCAATGTGTCTC
VDAG_08282-qF	CCTTCTGTTGTATCCGTGCT
VDAG_08282-qR	CGTGAAAGATGGGATCTGAC
VDAG_04954-qF	CTCAAATCCCAGGTCATCAG
VDAG_04954-qR	TACACACTTTTGGTGCATGG
VDAG_00261-qF	GGTACCCGTACTCCAACTCC
VDAG_00261-qR	CTTCTTGCTGCCGTAGAGAG
VDAG_01467-qF	CCAACCTTCACAATGGAGAC
VDAG_01467-qR	CATCGTGAAGAGGAGTTGCT
VDAG_05386-qF	CCCAGAATTATCGCACACTC
VDAG_05386-qF	GACAATGTTGACGACGTGAG
VDAG_04641-qF	GATGCCAGCAGTTACAGGAG
VDAG_04641-qR	TTGAAGAAGCCATGGAAGTC
VDAG_02898-qF	GACATATGGCATCACAACGA
VDAG_02898-qR	GTAACCGACACCGTACTTGG
VDAG_02175-qF	ATCTTGGAACCTGCCTCTCT
Note:The underlined part is the restriction sites. EcoRI:GAATTC, KpnI: GGTACC
